# Supplementary material for: An optimized library for reference-based deconvolution of whole-blood biospecimens assayed using the Illumina HumanMethylationEPIC BeadArray
Source: PubMed Central journal article supplement (PMC5975716; doi:10.1186/s13059-018-1448-7), 2018-05-29

## Additional file 1: Fig. S1 to Fig. S7 and Table S1

An optimized library for reference-based deconvolution of whole-blood biospecimens assayed using the Illumina HumanMethylationEPIC BeadArray

**Authors:** Lucas A. Salas<sup>1†</sup>, Devin C. Koestler<sup>2†</sup>, Rondi Butler<sup>3</sup>, Helen Hansen<sup>4</sup>, John K. Wiencke<sup>4</sup>, Karl T. Kelsey<sup>3</sup>, Brock C. Christensen<sup>1,5\*</sup>

### Affiliations:

<sup>1</sup>Department of Epidemiology, Geisel School of Medicine, Dartmouth College, Lebanon, NH.

<sup>2</sup> Department of Biostatistics, University of Kansas Medical Center, Kansas City, KS.

<sup>3</sup> Departments of Epidemiology and Pathology and Laboratory Medicine, Brown University, Providence, RI.

<sup>4</sup> Department of Neurological Surgery, Institute for Human Genetics, University of California San Francisco, San Francisco CA.

<sup>5</sup>Departments of Molecular and Systems Biology, and Community and Family Medicine, Geisel School of Medicine, Dartmouth College, Lebanon NH.

\*Correspondence to: [Brock.C.Christensen@dartmouth.edu](mailto:Brock.C.Christensen@dartmouth.edu)

†Equal contributors.

### Table of Contents

|                                                                                                                                                                                                                                                                                                                                  |   |
|----------------------------------------------------------------------------------------------------------------------------------------------------------------------------------------------------------------------------------------------------------------------------------------------------------------------------------|---|
| <b>Fig. S1.</b> Estimated cell purity by flow cytometry per cell type.....                                                                                                                                                                                                                                                       | 2 |
| <b>Fig. S2.</b> Heatmap based on a hierarchical cluster of purified cell types and cell mixtures based on the array SNPs. ....                                                                                                                                                                                                   | 3 |
| <b>Fig. S3.</b> Association between the top 20 principal components and potential confounders for DNA methylation.....                                                                                                                                                                                                           | 4 |
| <b>Fig. S4.</b> Iterative testing of different L-DMR library sizes using the IDOL optimization algorithm.                                                                                                                                                                                                                        | 5 |
| <b>Table S1.</b> Cell composition percentages for the artificial reconstruction samples. ....                                                                                                                                                                                                                                    | 6 |
| <b>Fig. S5.</b> Comparison of several probe selection methods and estimate cell proportions using constrained projection/ quadratic programming CP/QP versus the reconstructed (true) DNA fraction in the artificial DNA mixtures .....                                                                                          | 7 |
| <b>Fig. S6.</b> Bland-Altman plots comparing the mean differences between the estimated cell fraction using three deconvolution methods and the true fraction in the artificial mixture per cell type.....                                                                                                                       | 8 |
| <b>Fig. S7.</b> Comparison of the estimate cell proportions using constrained projection/ quadratic programming CP/QP using an IDOL optimized library restricted to the Illumina HumanMethylation 450k-450k array versus the reconstructed (true) DNA fraction in the artificial DNA mixtures arrayed in the 450k platform ..... | 9 |

**Fig. S1.** Estimated cell purity by flow cytometry per cell type

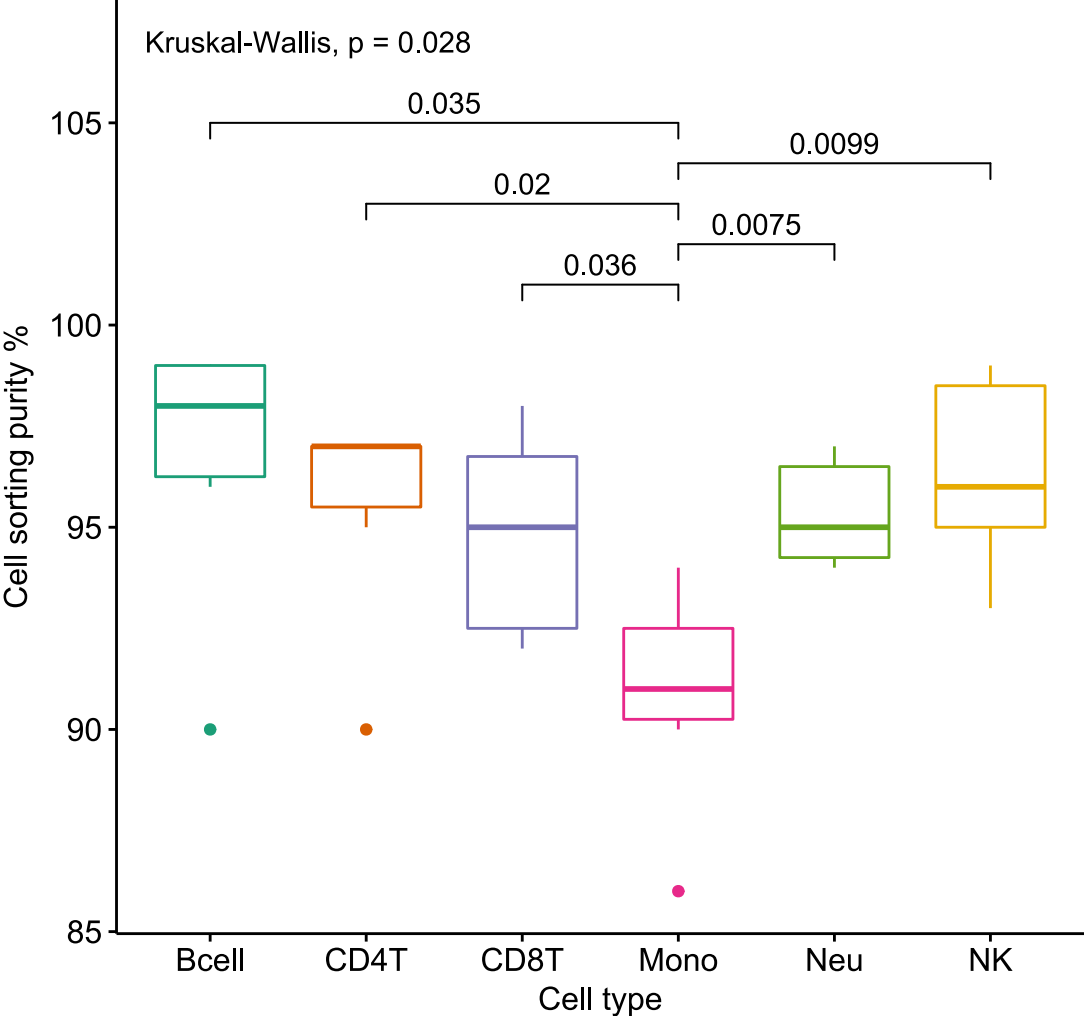

Monocyte estimates purity were statistically significant different to the other cell types.

**Fig. S2.** Heatmap based on a hierarchical cluster of purified cell types and cell mixtures based on the array SNPs.

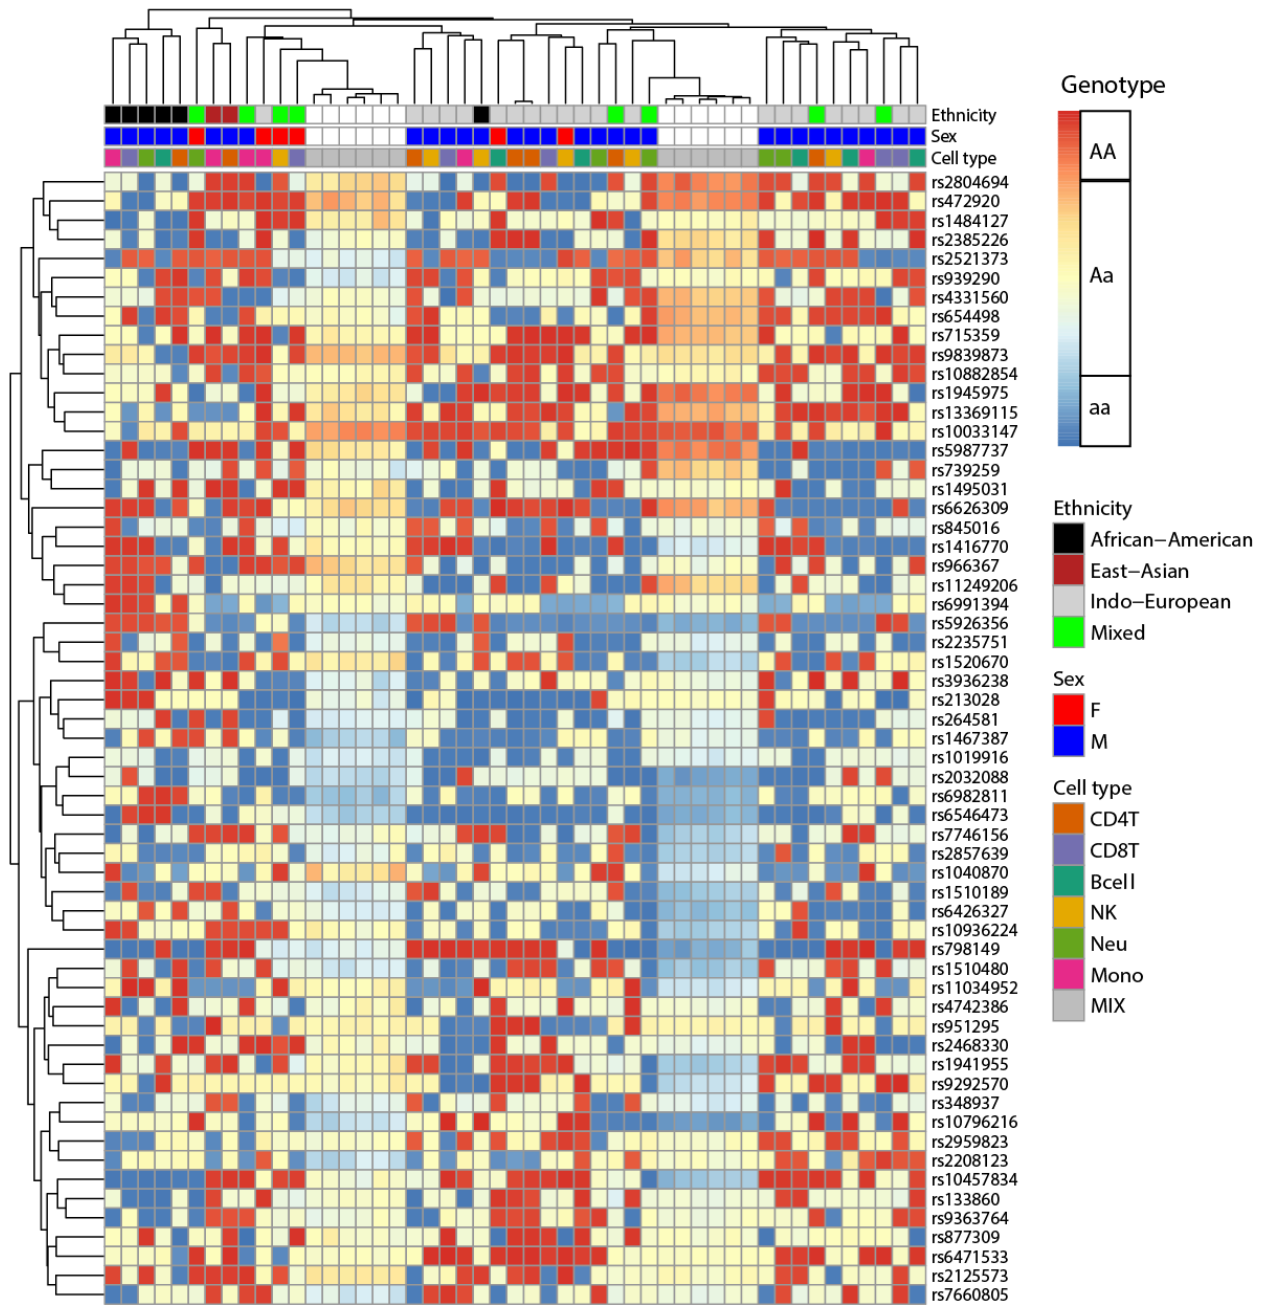

Notes: 1) Most of the African American and East-Asian clustered according to the 59 control SNPs in the array. Ethnic groups correspond to a very broad categorization, for specific self-attributed ethnicity background see the database information. 2) Although the genotype scale is based on  $\beta$ -values, the heatmap should be interpreted as three genotype categories: red (>0.8) AA two major alleles, yellow (>0.2-≤0.8) Aa or one minor allele, and blue (≤0.2) aa or two minor alleles present on the SNP.

**Fig. S3.** Association between the top 20 principal components and potential confounders for DNA methylation.

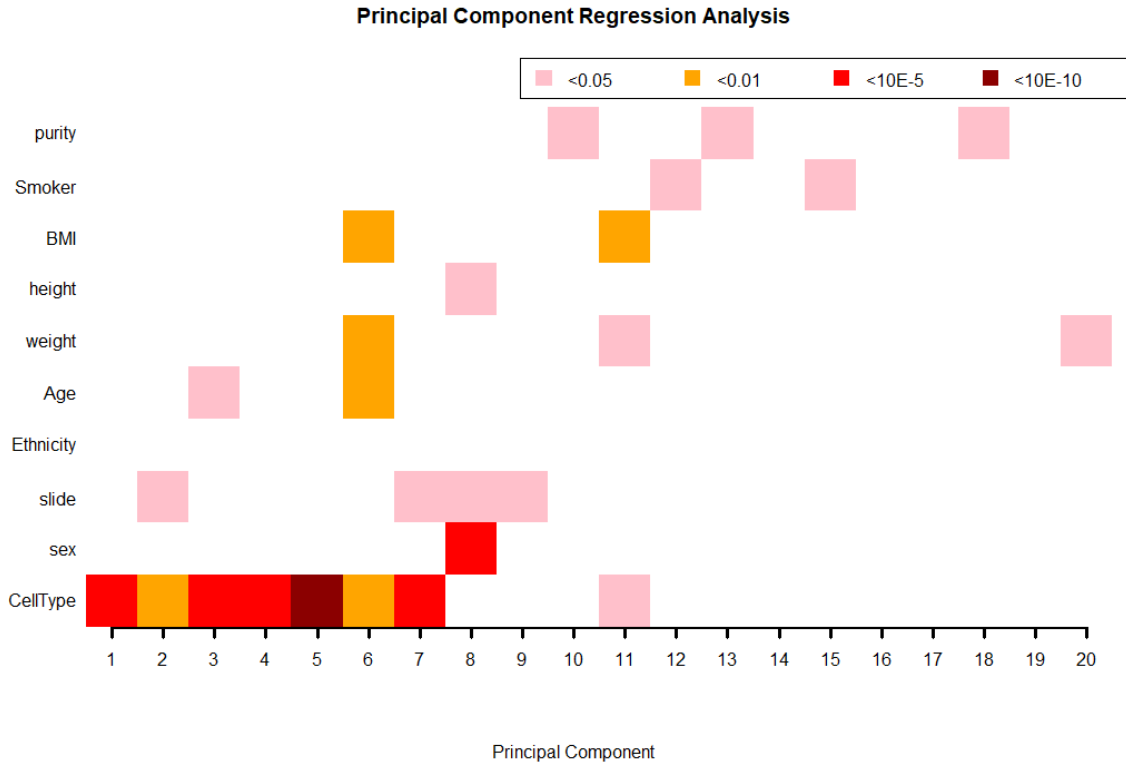

Abbreviations: purity: flow sorted cell purity estimations, smoker: current vs never smoker, BMI: body mass index, age: age in years, ethnicity: African-American, East-Asian, Indo-European, Mixed (Hispanic, others).

**Fig. S4.** Iterative testing of different L-DMR library sizes using the IDOL optimization algorithm.

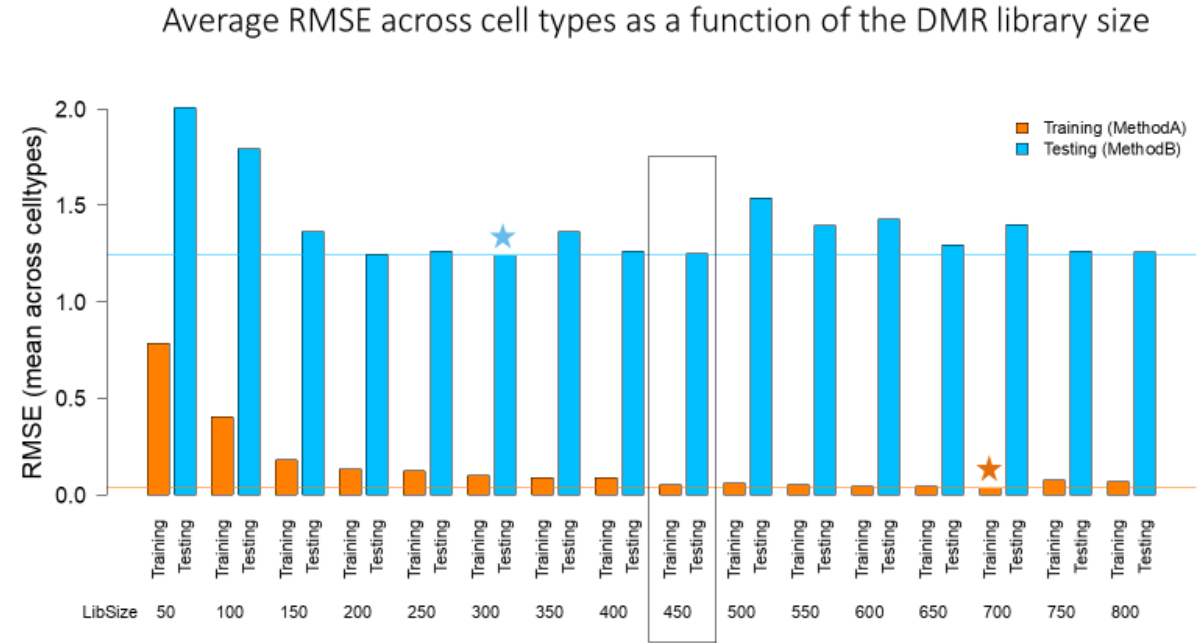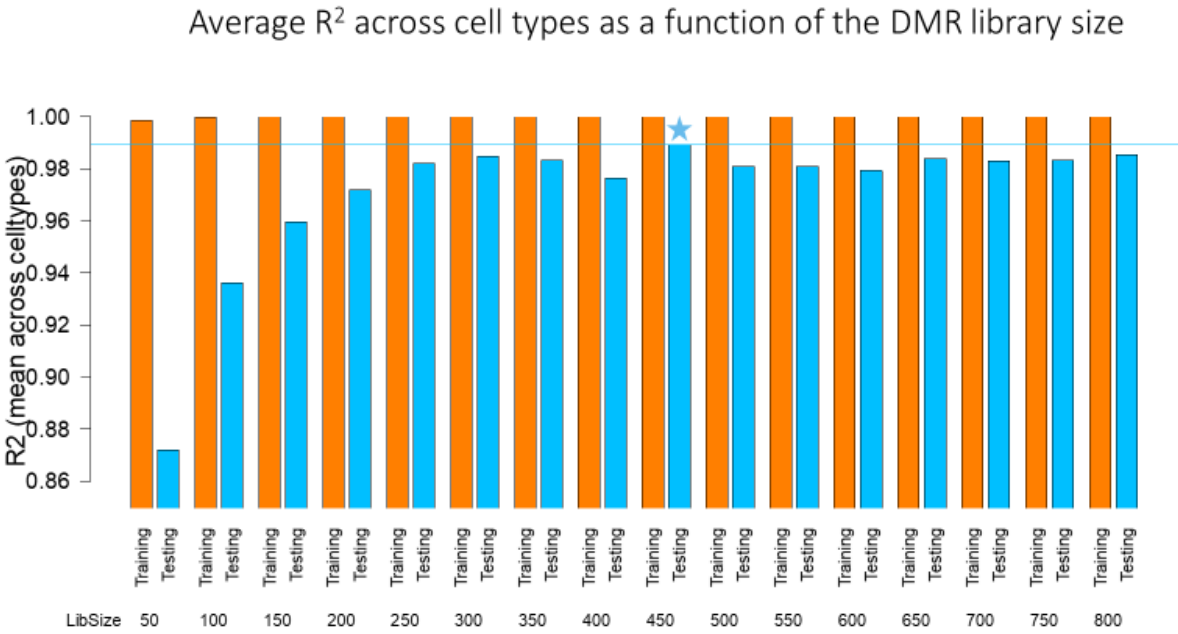

**Table S1.** Cell composition percentages for the artificial reconstruction samples.

| <b>Mixture</b>        |               | <b>Cell Percentage (%)</b> |             |              |           |                        |            |
|-----------------------|---------------|----------------------------|-------------|--------------|-----------|------------------------|------------|
|                       |               | <b>Lymphoid Lineage</b>    |             |              |           | <b>Myeloid Lineage</b> |            |
| <b>Reconstruction</b> | <b>Sample</b> | <b>CD4T</b>                | <b>CD8T</b> | <b>Bcell</b> | <b>NK</b> | <b>Mono</b>            | <b>Neu</b> |
| Method a              | 1a            | 13                         | 11          | 16           | 12        | 23                     | 25         |
|                       | 2a            | 7                          | 19          | 19           | 15        | 19                     | 21         |
|                       | 3a            | 6                          | 33          | 8            | 11        | 19                     | 23         |
|                       | 4a            | 16                         | 29          | 7            | 15        | 22                     | 11         |
|                       | 5a            | 11                         | 20          | 20           | 22        | 10                     | 17         |
|                       | 6a            | 18                         | 13          | 26           | 15        | 22                     | 6          |
| Method b              | 1b            | 13                         | 2           | 1            | 4         | 5                      | 75         |
|                       | 2b            | 16                         | 11          | 1            | 2         | 7                      | 63         |
|                       | 3b            | 9                          | 6           | 2            | 0         | 10                     | 73         |
|                       | 4b            | 14                         | 8           | 2            | 3         | 6                      | 67         |
|                       | 5b            | 12                         | 5           | 6            | 7         | 4                      | 66         |
|                       | 6b            | 15                         | 4           | 4            | 2         | 5                      | 70         |

**Fig. S5.** Comparison of several probe selection methods and estimate cell proportions using constrained projection/ quadratic programming CP/QP versus the reconstructed (true) DNA fraction in the artificial DNA mixtures

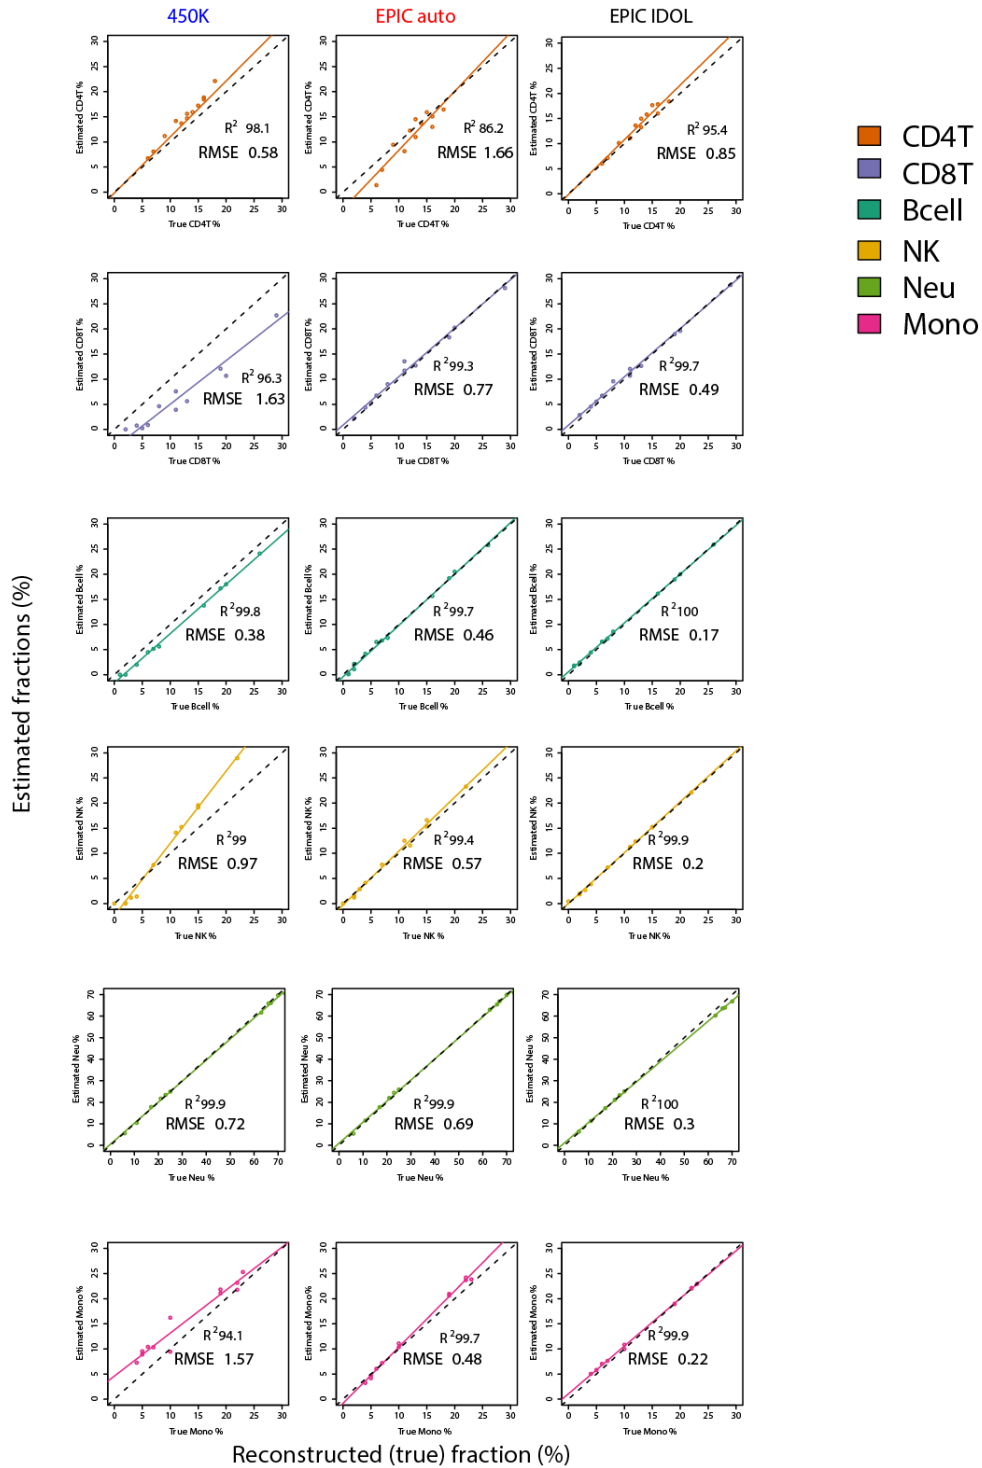

**Fig. S6.** Bland-Altman plots comparing the mean differences between the estimated cell fraction using three deconvolution methods and the true fraction in the artificial mixture per cell type

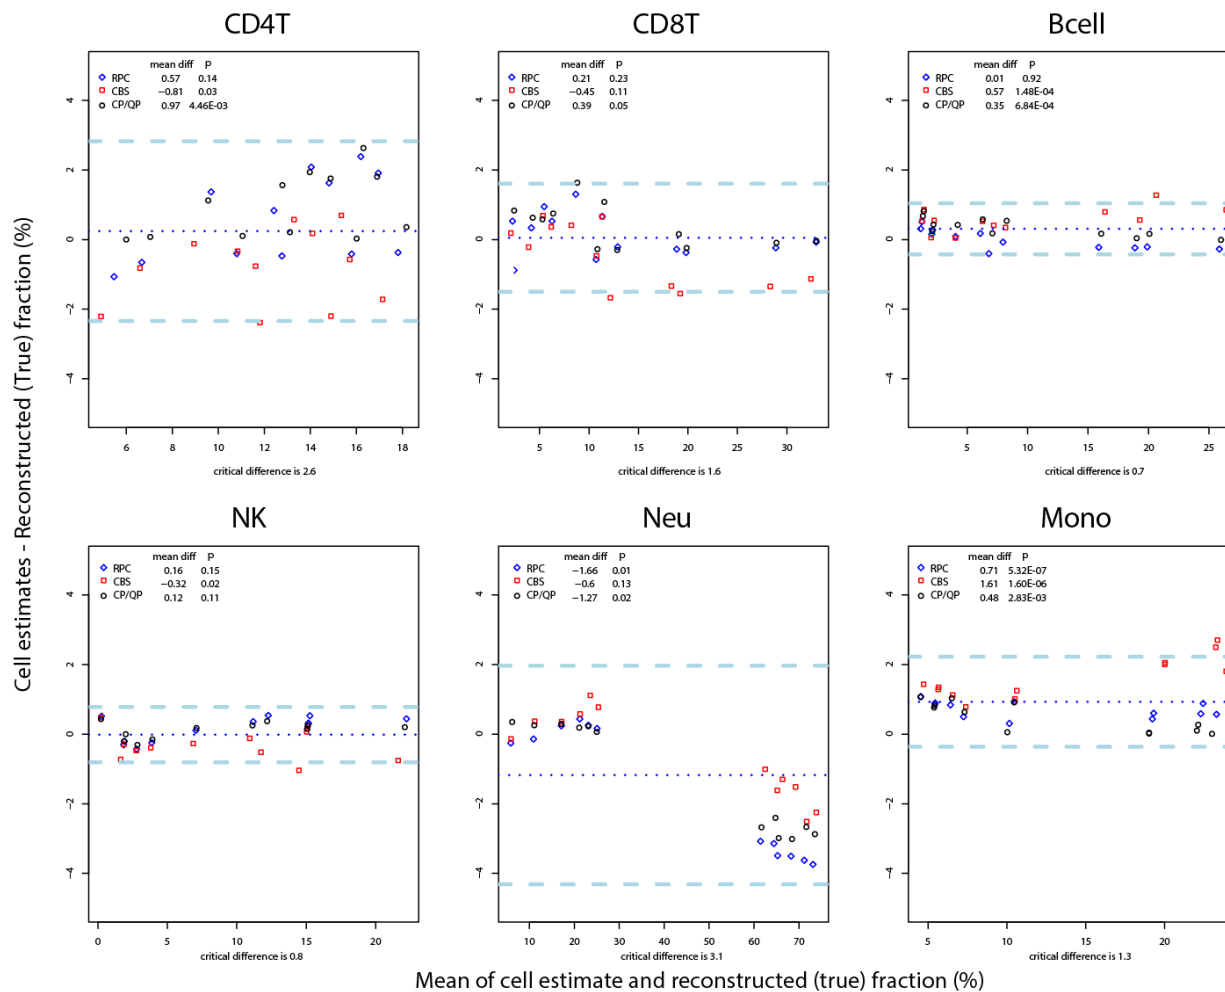

Notes: in the Bland Altman plots, the x axes show the mean of each estimate versus the corresponding true value, the y axes show the mean difference for Robust Partial Correlation-RPC (blue diamonds), CIBERSORT-CBS (red squares), and constrained projection/quadratic programming-CP/QP (black circles). The confidence bands (dashed horizontal lines) are 2 SD (critical 95% confidence interval difference) from the mean of the differences (dark dotted line). The mean difference per method and the paired t-test p-value are summarized on the top left of each plot.



**Fig. S7.** Comparison of the estimate cell proportions using constrained projection/ quadratic programming CP/QP using an IDOL optimized library restricted to the Illumina HumanMethylation 450k-450k array versus the reconstructed (true) DNA fraction in the artificial DNA mixtures arrayed in the 450k platform

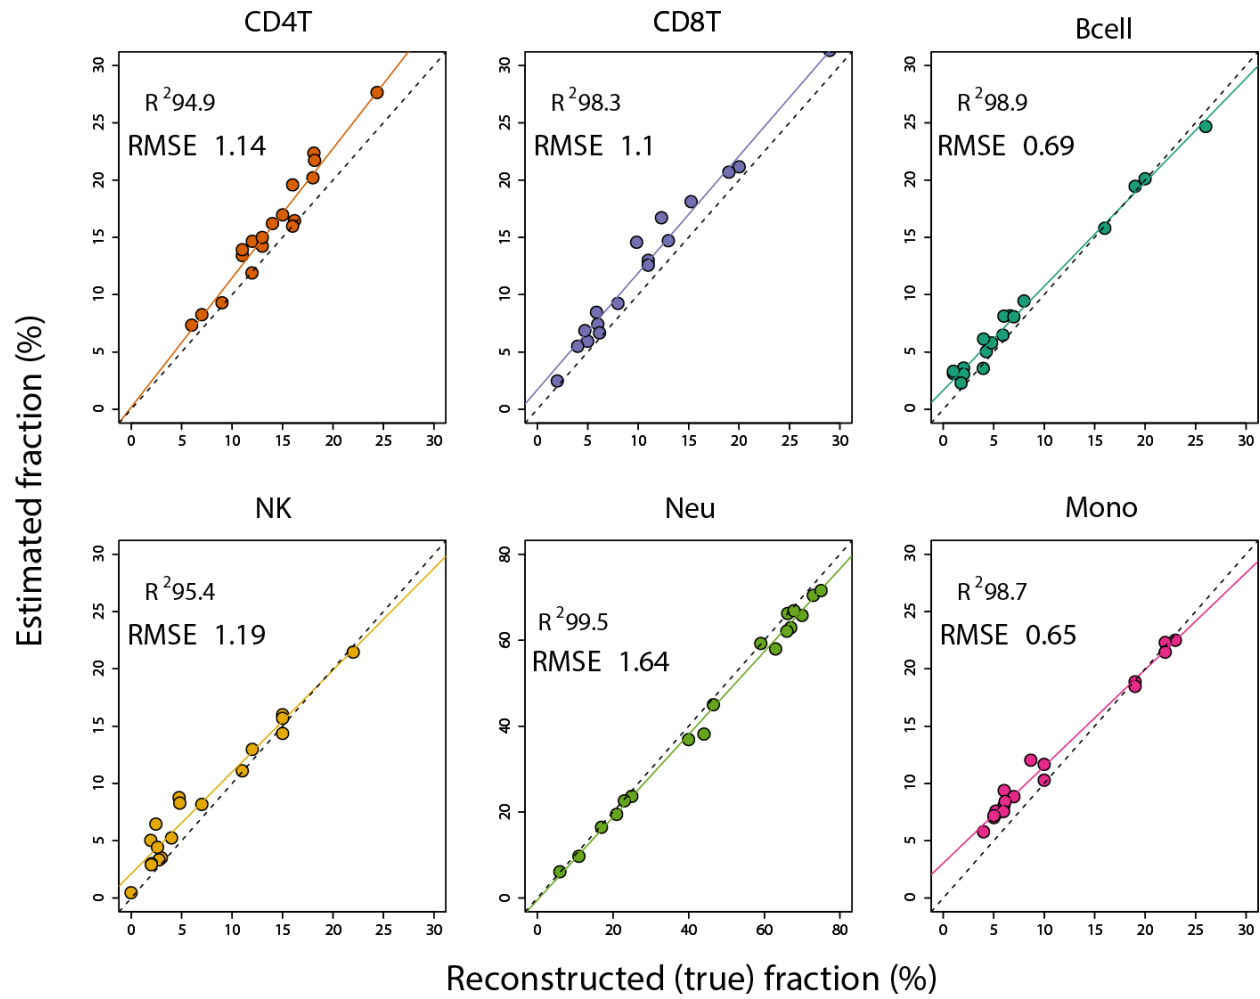

Supplement: 13059_2018_1448_MOESM1_ESM.pdf [file 13059_2018_1448_MOESM1_ESM.pdf]
